# Supplementary material
Source: PubMed Central journal article supplement (PMC3595361)
Supplement: NIHMS391101-supplement-Supp_Table_S1.pdf [file NIHMS391101-supplement-Supp_Table_S1.pdf]

Supplemental Table 1. Odds ratios for lung cancer and GAG genotype by histologic type

| Histology               |                       | GAG Genotype |                  |                  |                  |                  |                  |
|-------------------------|-----------------------|--------------|------------------|------------------|------------------|------------------|------------------|
|                         |                       | GAG-9/9      | GAG-7/7          | GAG-7/8          | GAG-7/9          | GAG-8/8          | GAG-8/9          |
| Squamous cell carcinoma | <i>No. of Cases:</i>  | 4            | 28               | 11               | 28               | 1                | 6                |
|                         | <i>OR (95% CI) †:</i> | 1.00 (ref.)  | 2.87 (0.83-9.89) | 3.12 (0.80-12.2) | 3.10 (0.90-10.6) | 1.39 (0.12-15.4) | 4.10 (0.90-18.8) |
| Adeno-carcinoma         | <i>No. of Cases:</i>  | 2            | 53               | 14               | 40               | 2                | 13               |
|                         | <i>OR (95% CI) †:</i> | 1.00 (ref.)  | 2.91 (1.06-7.99) | 2.12 (0.69-6.55) | 2.59 (0.93-7.18) | 1.55 (0.26-9.42) | 4.56 (1.38-15.1) |
| Small cell carcinoma    | <i>No. of Cases:</i>  | 1            | 11               | 7                | 8                | 2                | 1                |
|                         | <i>OR (95% CI) †:</i> | 1.00 (ref.)  | 3.40 (0.41-28.2) | 5.67 (0.64-50.3) | 2.51 (0.29-21.4) | 7.61 (0.59-98.5) | 4.12 (0.33-51.3) |
| Large cell carcinoma    | <i>No. of Cases:</i>  | 4            | 9                | 2                | 8                | 0                | 1                |
|                         | <i>OR (95% CI) †:</i> | 1.00 (ref.)  | 0.51 (0.14-1.87) | 0.40 (0.07-2.45) | 0.56 (0.15-2.11) | -                | 0.34 (0.03-3.47) |

Abbreviations: 95% CI, 95% confidence interval; OR, odds ratio.

† Odds ratios were adjusted for age, sex, body mass index and smoking.
