# Supplementary material
Source: PubMed Central journal article supplement (PMC3595361)
Supplement: NIHMS391101-supplement-Supp_Table_S2.pdf [file NIHMS391101-supplement-Supp_Table_S2.pdf]

Supplemental Table 2. Odds ratios for aerodigestive tract cancer and GAG genotype by site

| Site           |                                 | GAG Genotype |                  |                  |                  |         |                  |
|----------------|---------------------------------|--------------|------------------|------------------|------------------|---------|------------------|
|                |                                 | GAG-9/9      | GAG-7/7          | GAG-7/8          | GAG-7/9          | GAG-8/8 | GAG-8/9          |
| Esophagus      | <i>No. of Cases:</i>            | 3            | 13               | 2                | 7                | 0       | 0                |
|                | <i>OR (95% CI)<sup>†</sup>:</i> | 1.00 (ref.)  | 0.90 (0.23-3.58) | 0.46 (0.07-2.97) | 0.59 (0.14-2.55) | -       | -                |
| Tongue         | <i>No. of Cases:</i>            | 0            | 16               | 12               | 14               | 2       | 4                |
|                | <i>OR (95% CI)<sup>†</sup>:</i> | -            | -                | -                | -                | -       | -                |
| Floor of mouth | <i>No. of Cases:</i>            | 0            | 4                | 1                | 5                | 0       | 2                |
|                | <i>OR (95% CI)<sup>†</sup>:</i> | -            | -                | -                | -                | -       | -                |
| Pharynx        | <i>No. of Cases:</i>            | 3            | 12               | 8                | 7                | 0       | 1                |
|                | <i>OR (95% CI)<sup>†</sup>:</i> | 1.00 (ref.)  | 3.40 (0.41-28.2) | 5.67 (0.64-50.3) | 2.51 (0.29-21.4) | -       | 4.12 (0.33-51.3) |
| Larynx         | <i>No. of Cases:</i>            | 3            | 19               | 5                | 13               | 0       | 2                |
|                | <i>OR (95% CI)<sup>†</sup>:</i> | 1.00 (ref.)  | 0.51 (0.14-1.87) | 0.40 (0.07-2.45) | 0.56 (0.15-2.11) | -       | 0.34 (0.03-3.47) |
| Other          | <i>No. of Cases:</i>            | 0            | 16               | 8                | 8                | 3       | 7                |
|                | <i>OR (95% CI)<sup>†</sup>:</i> | -            | -                | -                | -                | -       | -                |

Abbreviations: 95% CI, 95% confidence interval; OR, odds ratio.

<sup>†</sup> Odds ratios were adjusted for age, sex, body mass index, alcohol consumption and smoking.
